# Supplementary material for: Theoretical study on substrate recognition and catalytic mechanisms of gephyronic acid dehydratase DH1
Source: Royal Society of Chemistry journal article supplement (doi:10.1039/d0cy01776k), 2021-01-01
Supplement: d0cy01776k1.pdf [file d0cy01776k1.pdf]

## *Electronic Supplementary Information*

### **Theoretical Study on Substrate Recognition and Catalytic**

### **Mechanism of Gephyronic Acid Dehydratase DH1**

Lei Liu<sup>#</sup>, Qian Yu<sup>#</sup>, Haoqing Zhang, Wentao Tao, Rufan Wang, Linqun Bai, Yi-Lei Zhao, Ting Shi<sup>\*</sup>

*State Key Laboratory of Microbial Metabolism, Joint International Research Laboratory of Metabolic and Developmental Sciences, School of Life Sciences and Biotechnology, Shanghai Jiao Tong University, Shanghai 200240, China*

\*To whom correspondence should be addressed:

**A/Prof. Ting Shi**

School of Life Sciences and Biotechnology

Shanghai Jiao Tong University

No. 800 Dongchuan Rd., Shanghai 200240, China

Tel/Fax: +86-21-34207347; tshi@sjtu.edu.cn

Email: tshi@sjtu.edu.cn

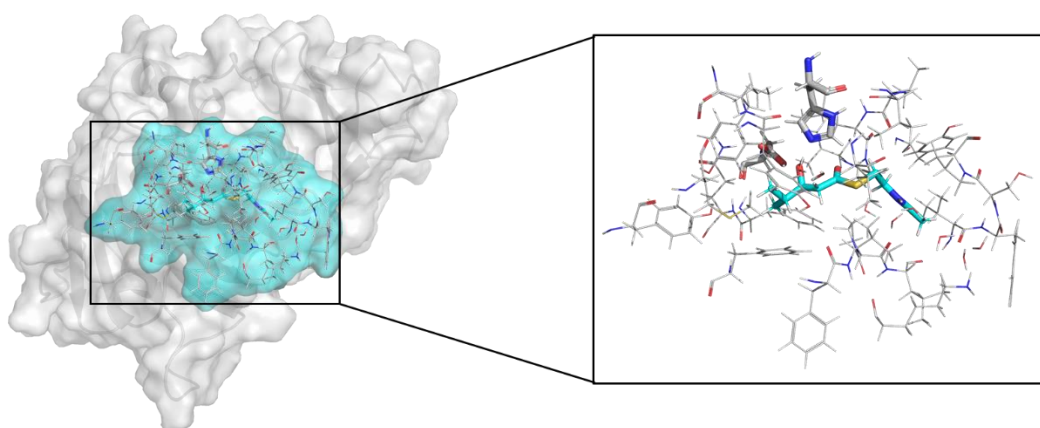

**Fig. S1** The whole system (large model, gray) and the truncated system (small model, blue) for QM/MM calculations.

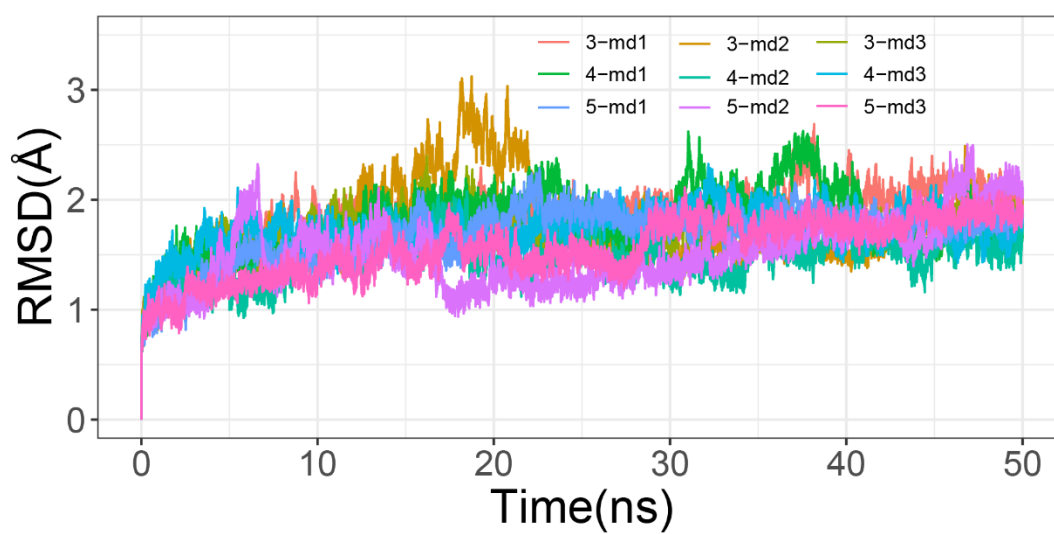

**Fig.S2** RMSD comparisons between sub3, sub4, sub5 systems.

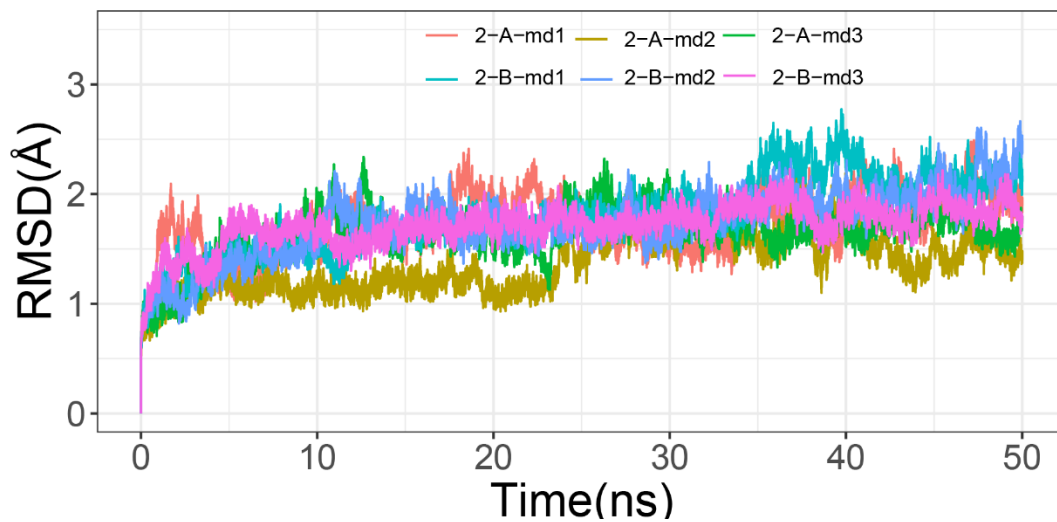

**Fig. S3** RMSD comparisons between 2-A and 2-B systems.

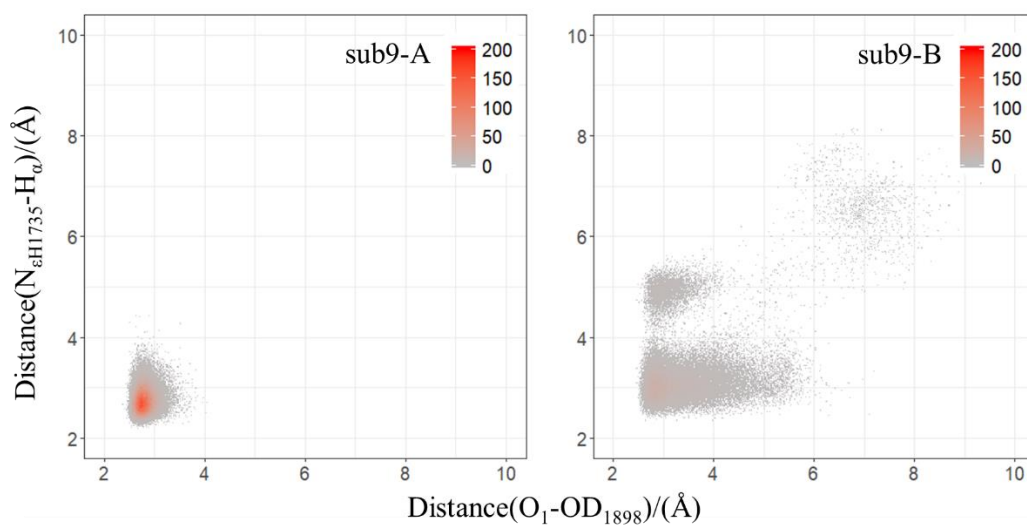

**Fig. S4** The distributions of  $d(O_1-O_{D1898})$  and  $d(N_{\epsilon H1735}-H_{\alpha}/H_{\gamma})$  in two systems.

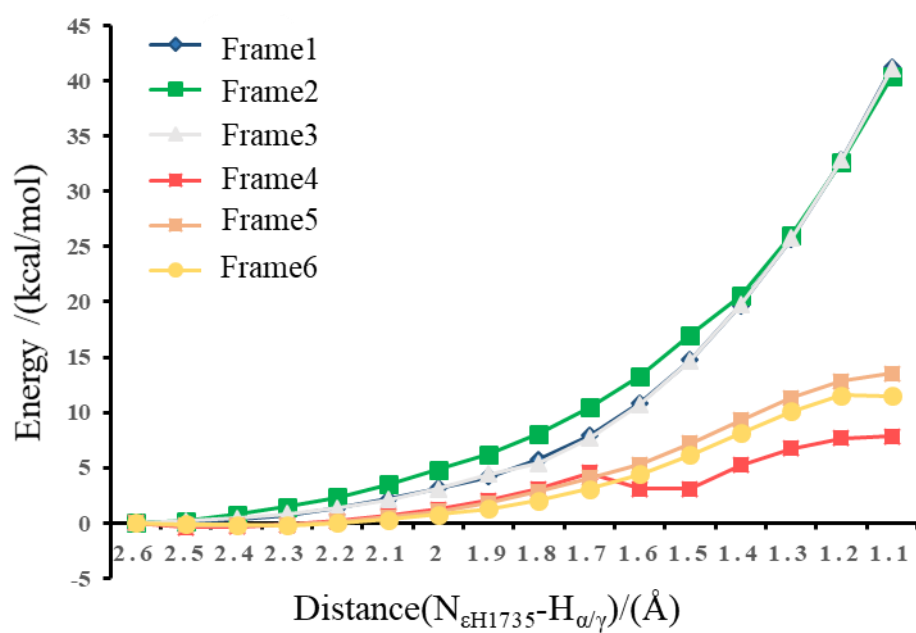

**Fig. S5** The energy profiles for the transfer of  $H_\alpha/H_\gamma$  to  $N_{\epsilon H1735}$  in sub9-A and sub9-B. Frames (1-3) were obtained from sub9-B system while Frames (4-6) were from sub9-A system.

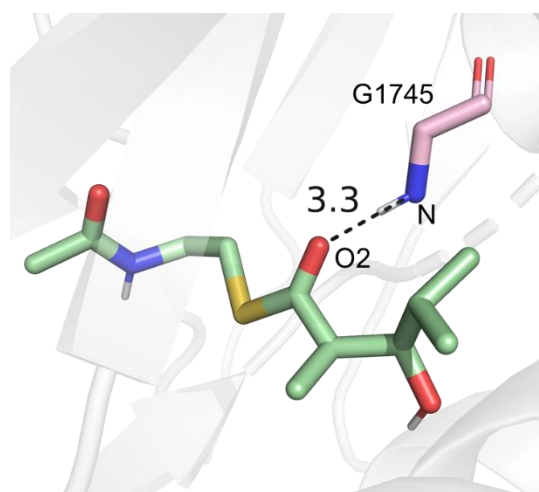

**Fig. S6** The hydrogen bond formed by residue Gly1745.

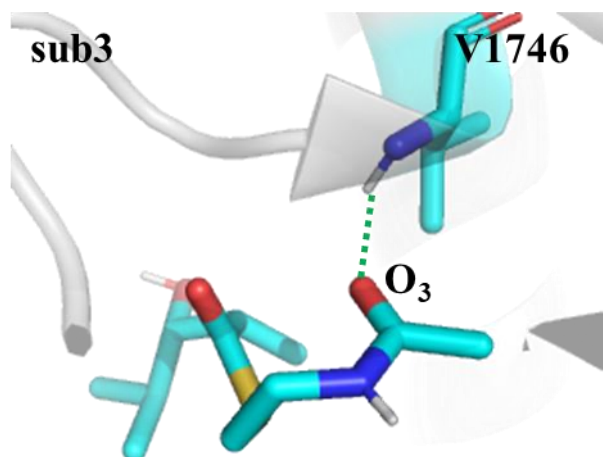

**Fig. S7** A hydrogen bond between O<sub>3</sub> atom and NH group of V1746 in sub3 system.

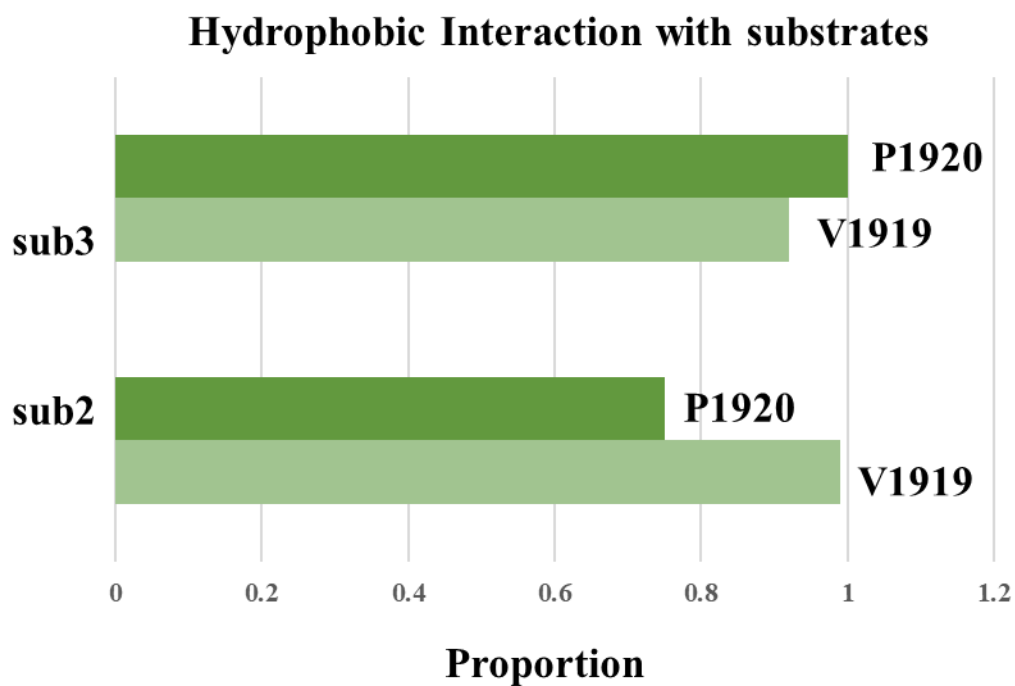

**Fig. S8** The proportion of hydrophobic interaction between substrate and residues (V1919, P1920) of GphF DH1 in sub2 and sub3 systems.

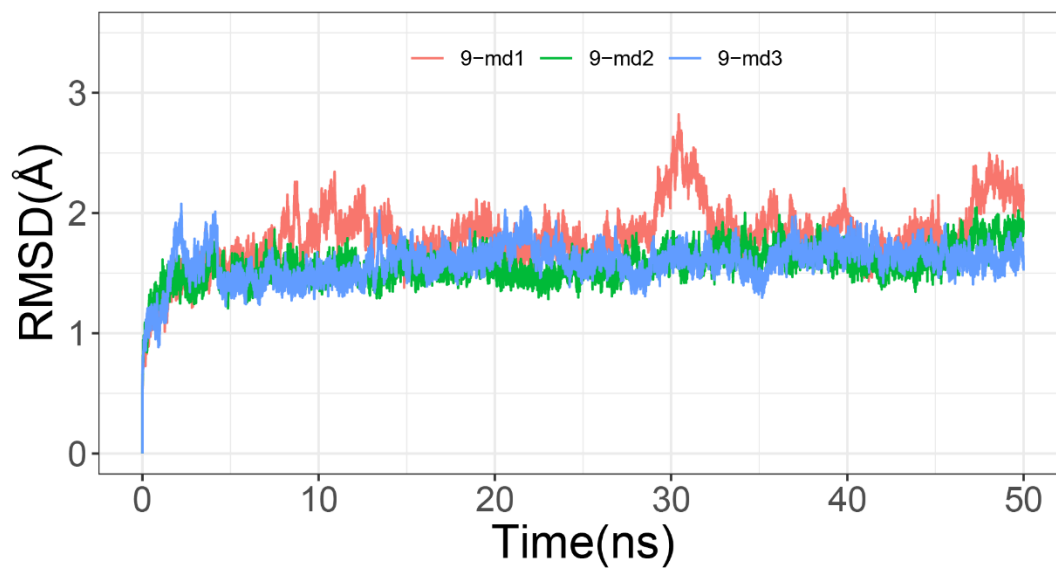

**Fig. S9** RMSD values in sub9 system.

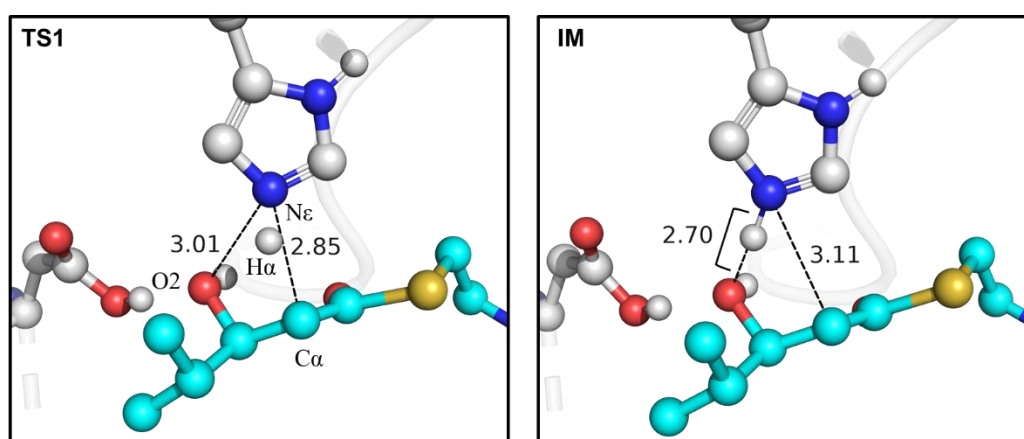

**Fig. S10** The structures of TS1 and IM in Path1 calculated by small model QM/MM calculations.

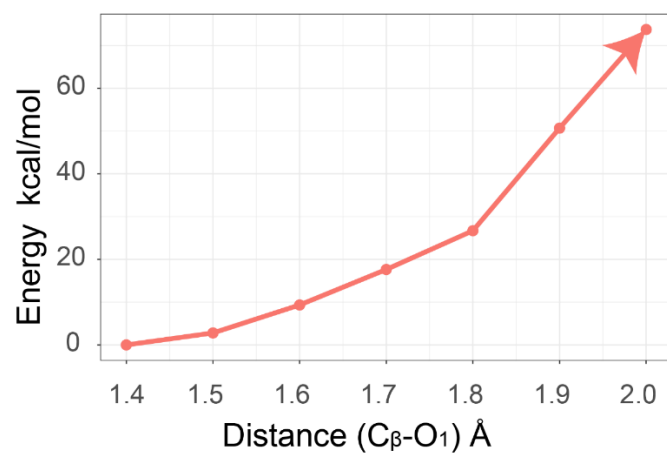

**Fig. S11** The energy profile of step1 for Path2 calculated by large model QM/MM calculations.

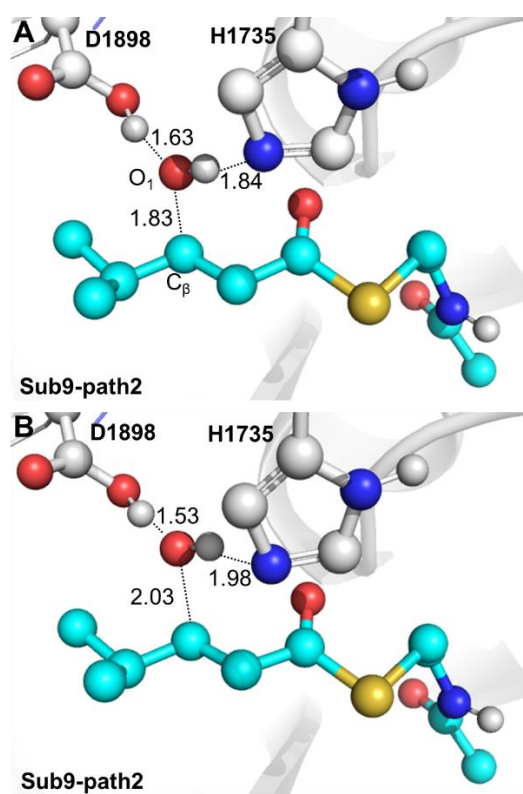

**Fig. S12** Structures along the reaction for Path2.

**Table S1.** Key distances and angles in reactant, transition, intermediate, and product in dehydration reaction

| Replica  | Key distances and angles                           | R      | TS1    | IM     | IM'    | TS2    | P      |
|----------|----------------------------------------------------|--------|--------|--------|--------|--------|--------|
| Replica1 | d(N <sub>ε</sub> -H <sub>α</sub> )                 | 2.29 Å | 1.08 Å | 1.06 Å | 1.07 Å | 1.63 Å | 1.84 Å |
|          | d(C <sub>α</sub> -H <sub>α</sub> )                 | 1.09 Å | 1.82 Å | 2.49 Å | -      | -      | -      |
|          | d(O2-H <sub>α</sub> )                              | -      | -      | 1.65 Å | 1.54 Å | 1.02 Å | 0.99 Å |
|          | d(C <sub>β</sub> -O2)                              | -      | -      | 1.48 Å | 1.45 Å | 1.74 Å | 3.11 Å |
|          | a(N <sub>ε</sub> -H <sub>α</sub> -C <sub>α</sub> ) | 148.9° | 156.8° | -      | -      | -      | -      |
|          | a(N <sub>ε</sub> -H <sub>α</sub> -O2)              | -      | -      | 168.6° | 162.6° | 171.2° | -      |
| Replica2 | d(N <sub>ε</sub> -H <sub>α</sub> )                 | 2.25 Å | 1.07 Å | 1.06 Å | 1.07 Å | 1.65 Å | 1.83 Å |
|          | d(C <sub>α</sub> -H <sub>α</sub> )                 | 1.10 Å | 1.82 Å | 2.62 Å | -      | -      | -      |
|          | d(O2-H <sub>α</sub> )                              | -      | -      | 1.71 Å | 1.56 Å | 1.02 Å | 0.98 Å |
|          | d(C <sub>β</sub> -O2)                              | -      | -      | 1.47 Å | 1.43 Å | 1.74 Å | 2.82 Å |
|          | a(N <sub>ε</sub> -H <sub>α</sub> -C <sub>α</sub> ) | 163.1° | 152.7° | -      | -      | -      | -      |
|          | a(N <sub>ε</sub> -H <sub>α</sub> -O2)              | -      | -      | 162.2° | 171.3° | 173.0° | -      |
| Replica3 | d(N <sub>ε</sub> -H <sub>α</sub> )                 | 2.23 Å | 1.07 Å | 1.05 Å | 1.07 Å | 1.58 Å | 1.88 Å |
|          | d(C <sub>α</sub> -H <sub>α</sub> )                 | 1.10 Å | 1.87 Å | 2.76 Å | -      | -      | -      |
|          | d(O2-H <sub>α</sub> )                              | -      | -      | 1.68 Å | 1.53 Å | 1.03 Å | 0.99 Å |
|          | d(C <sub>β</sub> -O2)                              | -      | -      | 1.45 Å | 1.43 Å | 1.76 Å | 3.26 Å |
|          | a(N <sub>ε</sub> -H <sub>α</sub> -C <sub>α</sub> ) | 151.6° | 160.4° | -      | -      | -      | -      |
|          | a(N <sub>ε</sub> -H <sub>α</sub> -O2)              | -      | -      | 157.0° | 167.5° | 173.0° | -      |



**Table S2.** The energies in ONIOM calculations (Default units are Hartree).

| Replica  |                                                  | R            | TS1          | IM           | IM'          | TS2          | P            |
|----------|--------------------------------------------------|--------------|--------------|--------------|--------------|--------------|--------------|
| Replica1 | MM <sub>model</sub>                              | 0.011694     | 0.120685     | 0.024064     | 0.038753     | 1.529047     | -0.000218    |
|          | MM <sub>real</sub>                               | -0.344988    | -0.233319    | -0.328874    | -0.307664    | 1.180232     | -0.353744    |
|          | MM <sub>environment</sub>                        | -0.356682    | -0.354004    | -0.352938    | -0.346417    | -0.348815    | -0.353526    |
|          | $\Delta$ MM <sub>environment</sub><br>(kcal/mol) | 0            | 1.7          | 2.3          | 6.4          | 4.9          | 2.0          |
|          | QM                                               | -1642.119631 | -1642.091329 | -1642.099264 | -1642.100689 | -1642.084264 | -1642.113623 |
|          | $\Delta$ QM (kcal/mol)                           | 0            | 17.8         | 12.8         | 11.9         | 22.2         | 3.8          |
| Replica2 | MM <sub>model</sub>                              | 0.013446     | 0.067314     | 0.016418     | 0.032563     | 1.507303     | 0.000916     |
|          | MM <sub>real</sub>                               | -0.377271    | -0.321603    | -0.372251    | -0.350717    | 1.123474     | -0.383723    |
|          | MM <sub>environment</sub>                        | -0.390717    | -0.388917    | -0.388669    | -0.383280    | -0.383829    | -0.384638    |
|          | $\Delta$ MM <sub>environment</sub><br>(kcal/mol) | 0.0          | 1.1          | 1.3          | 4.7          | 4.3          | 3.8          |
|          | QM                                               | -1642.120503 | -1642.093159 | -1642.09893  | -1642.10018  | -1642.08669  | -1642.11357  |
|          | $\Delta$ QM (kcal/mol)                           | 0            | 17.2         | 13.5         | 12.8         | 21.2         | 4.3          |
| Replica3 | MM <sub>model</sub>                              | 0.034219     | 0.092564     | 0.225716     | 0.037539     | 1.494310     | 0.021319     |
|          | MM <sub>real</sub>                               | -0.371426    | -0.313281    | -0.181108    | -0.360256    | 1.096301     | -0.379182    |
|          | MM <sub>environment</sub>                        | -0.405645    | -0.405844    | -0.406824    | -0.397795    | -0.398009    | -0.400500    |
|          | $\Delta$ MM <sub>environment</sub><br>(kcal/mol) | 0.0          | -0.1         | -0.7         | 4.9          | 4.8          | 3.2          |
|          | QM                                               | -1642.120827 | -1642.095914 | -1642.10073  | -1642.0982   | -1642.08336  | -1642.11752  |
|          | $\Delta$ QM (kcal/mol)                           | 0            | 15.6         | 12.6         | 14.2         | 23.5         | 2.1          |

**Table S3.** Energetic corrections (kcal/mol) at different levels with M062X method sub9 system

| Replica   | Different levels      | R | TS1  | IM   | IM'  | TS2  | P    |
|-----------|-----------------------|---|------|------|------|------|------|
| Replica 1 | M062X/6-31G*          | 0 | 26.2 | 23.6 | 23.1 | 28.4 | 9.4  |
|           | M062X/6-31G*(SMD)     | 0 | 21.8 | 18.0 | 22.1 | 31.7 | 12.2 |
|           | M062X/6-311+G**       | 0 | 24.1 | 21.0 | 20.1 | 25.2 | 2.8  |
|           | M062X/6-311+G***(SMD) | 0 | 19.4 | 15.1 | 18.3 | 27.1 | 5.8  |
| Replica 2 | M062X/6-31G*          | 0 | 29.0 | 26.9 | 23.7 | 29.5 | 9.5  |
|           | M062X/6-31G*(SMD)     | 0 | 21.1 | 17.7 | 19.6 | 29.0 | 13.1 |
|           | M062X/6-311+G**       | 0 | 25.6 | 23.6 | 20.8 | 25.7 | 3.9  |
|           | M062X/6-311+G***(SMD) | 0 | 18.3 | 14.8 | 17.4 | 25.5 | 8.2  |

|           |                      |   |      |      |      |      |      |
|-----------|----------------------|---|------|------|------|------|------|
| Replica 3 | M062X/6-31G*         | 0 | 25.2 | 23.2 | 25.4 | 31.4 | 10.1 |
|           | M062X/6-31G*(SMD)    | 0 | 18.1 | 14.6 | 21.6 | 31.9 | 10.4 |
|           | M062X/6-311+G**      | 0 | 22.4 | 22.4 | 22.7 | 27.7 | 4.7  |
|           | M062X/6-311+G**(SMD) | 0 | 15.5 | 11.9 | 19.1 | 28.3 | 5.3  |

**Table S4.** Key distances in reactant, transition, intermediate, and product in sub10 system

|                                                    | R      | TS1    | IM     | TS2    | P     |
|----------------------------------------------------|--------|--------|--------|--------|-------|
| d(N <sub>ε</sub> -H <sub>γ</sub> )                 | 2.1 Å  | 1.2 Å  | 1.1 Å  | 1.1 Å  | 2.1 Å |
| d(C <sub>γ</sub> -H <sub>γ</sub> )                 | 1.1 Å  | 1.5 Å  | 3.2 Å  | -      | -     |
| d(C <sub>α</sub> -H <sub>γ</sub> )                 | -      | -      | 1.9 Å  | 1.6 Å  | 1.1 Å |
| a(N <sub>ε</sub> -H <sub>γ</sub> -C <sub>γ</sub> ) | 133.5° | 167.2° | -      | -      | -     |
| a(N <sub>ε</sub> -H <sub>γ</sub> -C <sub>α</sub> ) | -      | -      | 154.4° | 162.3° | -     |

**Table S5.** Energetic corrections (kcal/mol) at different levels with M062X method sub10 system

|                      | R | TS1  | IM   | TS2  | P    |
|----------------------|---|------|------|------|------|
| M062X/6-31G*(SMD)    | 0 | 19.4 | 11   | 13.4 | -5.4 |
| M062X/6-311+G**      | 0 | 20.6 | 17.1 | 17.8 | -1.1 |
| M062X/6-311+G**(SMD) | 0 | 17.2 | 8.4  | 11.2 | -6.1 |
